# Supplementary material for: The endocytosis of oxidized LDL via the activation of the angiotensin II type 1 receptor
Source: PubMed Central journal article supplement (PMC7890409; doi:10.1016/j.isci.2021.102076), 2021-01-21
Supplement: mmc1.pdf [file mmc1.pdf]

## **Supplemental Information**

### **The endocytosis of oxidized LDL via the activation of the angiotensin II type 1 receptor**

**Toshimasa Takahashi, Yibin Huang, Koichi Yamamoto, Go Hamano, Akemi Kakino, Fei Kang, Yuki Imaizumi, Hikari Takeshita, Yoichi Nozato, Satoko Nozato, Serina Yokoyama, Motonori Nagasawa, Tatsuo Kawai, Masao Takeda, Taku Fujimoto, Kazuhiro Hongyo, Futoshi Nakagami, Hiroshi Akasaka, Yoichi Takami, Yasushi Takeya, Ken Sugimoto, Herbert Y. Gaisano, Tatsuya Sawamura, and Hiromi Rakugi**

## 1 **Transparent Methods**

### 2 **Cell culture and materials**

3 HUVECs and HAECs were cultured in EGM-2 (Clontech, USA). Cells less than five  
4 passages were used for the experiments. Transgenic CHO cells were maintained in F-12  
5 Nutrient Mixture with Glutamax<sup>TM</sup>-I (Thermo Fisher Scientific, USA), 10% fetal bovine  
6 serum (FBS), and appropriate selection reagents as described below. Transcription of the  
7 genes in transgenic CHO cells was induced by adding doxycycline into culture media for  
8 24 h at a final concentration of 300 ng/ml. CHO-K1 cells were maintained in F-12  
9 Nutrient Mixture with Glutamax<sup>TM</sup>-I (Thermo Fisher Scientific, USA) and 10% FBS.  
10 barbadin was purchased from Toronto research chemicals (Canada). Losartan, telmisartan,  
11 and irbesartan were purchased from Cayman Chemical (USA).

12

### 13 **Construction of plasmid vectors**

14 For stable transformants, pTRE2hyg vector encoding mutated human AT1 with impaired  
15 ability to activate G protein (pTRE2hyg-HA-FLAG-hAT1m $\beta$ ) and pTRE2hyg vector  
16 (Clontech, USA) encoding mutated hAT1 with impaired ability to activate  $\beta$ -arrestin  
17 (pTRE2hyg-HA-FLAG-hAT1mg) were created using site direct mutagenesis. Briefly,  
18 pTRE2hyg-HA-FLAG-hAT1m $\beta$  was created using a primeSTAR mutagenesis basal kit  
19 (Takara, Japan) to delete amino acids 221 and 222 from the pTRE2hyg vector encoding  
20 hAT1 tagged with signal peptide-HA-FLAG at the N-terminus (pTRE2hyg-HA-FLAG-  
21 hAT1) (Haendeler et al., 2000; Yamamoto et al., 2015). pTRE2hyg-HA-FLAG-hAT1mg  
22 was created using a KOD-plus mutagenesis kit (Toyobo, Japan) to substitute amino acids  
23 at the carboxyl terminus (Thr (332), Ser (335), Thr (336), Ser (338)) into alanine from  
24 pTRE2hyg-HA-FLAG-hAT1 (Qian et al., 2001). For the BRET assay, human  $\beta$ -arrestin

25 2 was subcloned into mVenus N1 (Plasmid #27793, Addgene). Expression vectors for  
26 LOX-1 and Dectin-1 were created as shown in a previous study (Yamamoto et al., 2015).  
27 For real-time imaging, LOX-1 tagged with V5-6×His at the C-terminus (V5-LOX-1) was  
28 subcloned into pmScarlet\_C1 (Plasmid #85042, Addgene) (mScarlet-LOX-1). HA-  
29 FLAG-hAT1, HA-FLAG-hAT1m $\beta$ , and HA-FLAG-hAT1mg were subcloned into  
30 pcDNA3-EGFP (Plasmid #85042, Addgene) (AT1-GFP, AT1mg-GFP, and AT1m $\beta$ -GFP).  
31 Plasmid encoding dominant-negative  $\beta$ -arrestin was created by subcloning the clathrin-  
32 binding domain of  $\beta$ -arrestin ( $\beta$ -arrestin (319–418)) into the pTRE2hyg vector (DN-  
33  $\beta$ arrestin) (Krupnick et al., 1997). Negative control vector of DN- $\beta$ -arrestin was created  
34 using primeSTAR mutagenesis basal kit to delete the clathrin binding box domain  
35 (LIELD) from DN- $\beta$ -arrestin (Kang et al., 2009).

36

### 37 **Stable transformants**

38 CHO-K1 cells expressing tetracycline-inducible human LOX-1 tagged with V5-6×His at  
39 C-terminus (CHO-LOX-1), cells expressing human HA-FLAG-hAT1 (CHO-AT1), and  
40 cells expressing both human LOX-1 and AT1 (CHO-LOX-1-AT1) were maintained as  
41 previously described (Fujita et al., 2009; Yamamoto et al., 2015). To establish cells  
42 expressing both LOX-1 and mutated AT1, pTRE2hyg-HA-FLAG-hAT1m $\beta$  or  
43 pTRE2hyg-HA-FLAG-hAT1mg were co-transfected with pSV2bsr vector (Funakoshi,  
44 Japan) into CHO-LOX-1 using Lipofectamin2000 transfection reagent (Thermo Fisher  
45 Scientific, USA). The stable transformants were selected with 400  $\mu$ g/ml of hygromycin  
46 B (Wako, Japan) and 10  $\mu$ g/ml of blasticidin S (Funakoshi, Japan). The resistant clones  
47 expressing LOX-1 and mutated AT1 in response to doxycycline (Calbiochem, USA) were  
48 selected for use in experiments (CHO-LOX-1-AT1mg and CHO-LOX-1-AT1m $\beta$ ).

49

50 **Immunofluorescence staining**

51 Tagged LOX-1 and AT1 (or mutated AT1) in genetically engineered CHO cells were  
52 detected using mouse anti-V5 (Nacalai, Japan) and rat anti-FLAG (Novus Biologicals,  
53 USA) antibodies in combination with rabbit Alexa488-conjugated anti-rat IgG and goat  
54 Alexa594-conjugated anti-mouse IgG (Thermo Fisher Scientific, USA), respectively, as  
55 reported previously (Yamamoto et al., 2015). Nuclei were counterstained with DAPI  
56 (Sigma, USA). Images were acquired with a fluorescence microscope (BZ-X700,  
57 Keyence, Japan).

58

59 **Cell-based ELISA**

60 Cells were seeded at 150,000 cells per well onto 96-well transparent cell culture plates  
61 and incubated overnight at 37°C. The following day, cultures were transferred to serum-  
62 free conditions and cells were further incubated for 24 h. Thereafter, cells were fixed by  
63 4% paraformaldehyde without permeabilization, incubated with mouse anti-V5 or rat  
64 anti-FLAG antibodies, then incubated with HRP-conjugated mouse or rat secondary  
65 antibodies, respectively. TMB reagents (SeraCare Life Sciences, USA) were then added  
66 to each well and the colorimetric reaction was stopped with stop solution (SeraCare Life

67 Sciences, USA). OD 450 values were measured using Multiskan Go (Thermo Fisher  
68 Scientific, USA). Each measurement value was adjusted by subtracting the value of  
69 negative control with secondary antibodies in the absence of first antibodies.

70

71

## 72 ***In situ* PLA**

73 *In situ* PLA was used to detect the proximity of LOX-1 with AT1 or mutated AT1 using  
74 Duolink, from Olink Bioscience (Uppsala, Sweden), according to our previous study  
75 (Yamamoto et al., 2015). Images were acquired using a fluorescence microscope (BZ-  
76 X700, Keyence, Japan). Quantitative fluorescence cell image analysis was performed  
77 using the BZ-X analyzer system (Keyence, Japan).

78

## 79 **Preparation of oxLDL and fluorescence-labelled oxLDL**

80 Human plasma LDL (1.019-1.063 g/ml) isolated by sequential ultracentrifugation was  
81 oxidized using 20  $\mu$ M CuSO<sub>4</sub> in PBS at 37°C for 24 h. Oxidation was terminated by  
82 adding excess EDTA. Oxidation of LDL was analyzed using agarose gel electrophoresis  
83 for migration versus LDL (Yamamoto et al., 2015). Labeling of oxLDL with 1,1-  
84 dioctadecyl-3,3,3,3-tetramethylindocarbocyanine perchlorate (DiI, Thermo Fisher

85 Scientific, USA) was performed as described previously (Yamamoto et al., 2015).

86

### 87 **Quantification of cellular cAMP content**

88 Gi-dependent inhibition of adenylyl cyclase activity was assessed by inhibition of

89 Forskolin-dependent cAMP production using a cAMP dynamic 2 kit (Cisbio, France).

90 Cells were seeded at 80,000 cells per well onto 96-well transparent cell culture plates and

91 incubated overnight at 37°C. The following day, cultures were transferred to serum-free

92 conditions and cells were further incubated for 24 h. Thereafter, cells were treated for 1

93 h with DMEM without phenol, 1 mM IBMX, and 1 μM Forskolin, including vehicle,

94 oxLDL, and AII at the indicated concentrations at 37°C, 5% CO<sub>2</sub>. Triton X was then

95 added to a final concentration of 1% and cell lysates were prepared after shaking the

96 plates for 30 min. Finally, cell lysates were transferred to 384-well white plates and cAMP

97 levels were measured by incubation of cell lysates with FRET reagents (the cryptate-

98 labeled anti-cAMP antibody and the d2-labeled cAMP analogue) for 1 h at 37°C. The

99 emission signals were measured at 590 and 665 nm after excitation at 340 nm, using the

100 ARTEMIS plate reader (Furuno Electric Co. Ltd, Japan). The FRET ratio:  $F =$

101 (fluorescence 665 nm/fluorescence 590 nm)  $\times 10^4$  was transformed into cAMP

102 concentration by calculation using the four-parameter logistic curve of standard samples.

103 Measurement values were normalized to that of vehicle treatment.

104

#### 105 **Quantification of cellular IP1 accumulation**

106 Gq-dependent activation of phospholipase C was quantified by measurement of IP1 using  
107 the IP-One assay kit (Cisbio, France). Cells were seeded at 80,000 cells per well onto 96-  
108 well transparent cell culture plates and incubated overnight at 37°C. The following day,  
109 cultures were transferred to serum-free conditions and further incubated for 24 h.  
110 Thereafter, cells were treated for 1 h with IP1 stimulation buffer mixed with the same  
111 amount of DMEM without phenol, including vehicle, oxLDL, and AII at an indicated  
112 concentration at 37°C, 5% CO<sub>2</sub>. Triton X was then added to a final concentration of 1%,  
113 and cell lysates were prepared after shaking the plates for 30 min. Finally, cell lysates  
114 were transferred to a 384-well white plate and IP1 levels were measured by incubation of  
115 cell lysates with FRET reagents (the cryptate-labeled anti-IP1 antibody and the d2-labeled  
116 IP1 analogue) for 1 h at 37°C. The emission signals were measured at 590 and 665 nm  
117 after excitation at 340 nm, using the ARTEMIS plate reader (Furuno Electric Co. Ltd.,  
118 Japan). The FRET ratio:  $F = (\text{fluorescence } 665 \text{ nm} / \text{fluorescence } 590 \text{ nm}) \times 10^4$  was  
119 transformed into IP1 concentration by calculation using the four-parameter logistic curve  
120 of standard samples. Measurement values were normalized to that of vehicle treatment.

121

122 **Real-time imaging of dynamics in LOX-1 and AT1 on cellular membranes**

123 Twenty-four hours before imaging experiments, CHO cells were transfected with LOX-  
124 1-mScarlet and mock-GFP AT1-GFP or AT1 mutants-GFP by electroporation and seeded  
125 in a 35 mm glass base dish (Iwaki, Japan) pre-coated with 1000X diluted 10 mg/ml Poly-  
126 L-Lysine (ScienCell, USA) 1 h before seeding. The growth medium was replaced with  
127 imaging buffer (pH 7.4) containing 125 mM NaCl, 5 mM KCl, 1.2 mM MgCl<sub>2</sub>, 1.3 mM  
128 CaCl<sub>2</sub>, 25 mM HEPES, and 3 mM D-glucose with pH adjusted to 7.4 with NaOH.  
129 Dynamic images of the cells were obtained at 25°C using SpinSR10 inverted spinning  
130 disk-type confocal super-resolution microscope (Olympus, Japan) equipped with a 100x  
131 NA1.49 objective lens (UAPON100XOTIRF, Olympus, Japan) and an ORCA-Flash 4.0  
132 V2 scientific CMOS camera (Hamamatsu Photonics KK, Japan) at 5 s intervals. The  
133 imaging experiment was performed with CellSens Dimension 1.11 software using 3D  
134 deconvolution algorithm (Olympus, Japan).

135

136 **Quantification of change in LOX-1 localization on cellular membrane**

137 A count of puncta was performed using separated images visualizing LOX-1-scarlet just  
138 before (0 min) and 3 min after ligand application. Puncta was manually counted by a



139 blinded observer, and number of puncta at 0 and 3 min was determined (N0 and N3,  
140 respectively). Change in puncta was calculated as  $(N0-N3)/N0$  (Fig 4a).

141

#### 142 **Detection of membrane-bound oxLDL**

143 Genetically engineered CHO cells were treated for 30 min with Dil-labeled oxLDL at a  
144 final concentration of 2  $\mu\text{g}/\text{ml}$  on ice, as described previously (Yamamoto et al., 2015).

145 The cells were then washed twice and fixed with neutral buffered formalin. Nuclei were  
146 stained with DAPI (1  $\mu\text{g}/\text{ml}$ ). Images were acquired using a fluorescence microscope  
147 (BZ-X700, Keyence, Japan). Quantitative fluorescence cell image analysis was  
148 performed using the BZ-X analyzer system (Keyence, Japan).

149

#### 150 **Visualization of co-localization of oxLDL with endocytic organelles and lysosome**

151 CHO-LOX-1-AT1 cells and HUVECs were seeded in a 35 mm four well glass base dish  
152 (Iwaki, Japan) pre-coated with 1000X diluted 10 mg/ml Poly-L-Lysine (ScienCell, USA)

153 1 h before seeding. The following day, cells were treated with CellLight® for early and  
154 late endosomes and lysosomes, according to the instructions (Thermo Fisher Scientific,  
155 USA). After 24 h, cells were treated for 30 min with Dil-labeled oxLDL at a concentration  
156 of 2  $\mu\text{g}/\text{ml}$ . The cells were then washed twice with cultured media and fixed with neutral

157 buffered formalin immediately or after 5 h incubation in a CO<sub>2</sub> incubator. Images were  
158 obtained using a SpinSR10 inverted spinning disk-type confocal super-resolution  
159 microscope (Olympus, Japan) equipped with a 100x NA1.49 objective lens  
160 (UAPON100XOTIRF, Olympus, Japan) and an ORCA-Flash 4.0 V2 scientific CMOS  
161 camera (Hamamatsu Photonics KK, Japan). The imaging experiment was performed with  
162 the CellSens Dimension 1.11 software using 3D deconvolution algorithm (Olympus,  
163 Japan).

164

#### 165 **Detection of colocalization of endosomes or lysosomes with Dil-oxLDL**

166 Before determining sub-pixel localization of lysosomes and endosomes, obtained raw  
167 images were processed by despeckle and à trous wavelet transform algorithm to reduce  
168 noise and remove the background with Fiji. Using custom MATLAB software, the  
169 weighted centroid sub-pixel localizations were detected automatically. We confirmed  
170 these results point-by-point to remove any possible artifacts then quantified the  
171 colocalizations. Based on the resolution limit and configuration of our microscope, we  
172 defined a 300 nm radius as the cut-off of subpixel colocalization.

173

174

175 **Detection of intracellular oxLDL content**

176 Genetically engineered CHO cells seeded in 96-well plates were treated for 30 min with  
177 Dil-labeled oxLDL at a concentration of 2  $\mu\text{g}/\text{ml}$  unless otherwise indicated in a  $\text{CO}_2$   
178 incubator at  $37^\circ\text{C}$ . HUVECs and HAECs in 96-well plates were treated for the indicated  
179 time duration (10min, 30min, or 6 h) with Dil-labeled oxLDL at a concentration of 2  
180  $\mu\text{g}/\text{ml}$  in a  $\text{CO}_2$  incubator. The cells were then washed twice with cultured media and  
181 further incubated overnight to wash out the membrane-bound oxLDL. The cells were then  
182 washed twice and fixed with neutral buffered formalin. Nuclei were stained with DAPI  
183 (1  $\mu\text{g}/\text{ml}$ ). Images were acquired using a fluorescence microscope (BZ-X700, Keyence,  
184 Japan). Quantitative fluorescence cell image analysis was performed using the BZ-X  
185 analyzer system (Keyence, Japan).

186

187 **Transfection of CHO cells with dominant negative  $\beta$ -arrestin**

188 Genetically engineered CHO cells were transfected with DN- $\beta$ -arrestin or negative  
189 control vector using Lipofectamin LTX & PLUS reagent (Thermo Fisher Scientific, USA),  
190 according to the manufacturer's instructions. Treatment with Dil-oxLDL was performed  
191 24 h after transfection.

192

193 **Luciferase reporter assay**

194 Cells were seeded in a 96-well plate and were cotransfected with 100 ng of a plasmid  
195 containing Firefly luciferase driven by the NF- $\kappa$ B binding site (Promega, USA), and 10  
196 ng of pRL-CMV Renilla luciferase control reporter vector (Promega Corp., Madison, WI,  
197 USA) by using Lipofectamine LTX with PLUS reagent kit (Thermo Fisher Scientific).  
198 After being cultured for 6 hours, the cells were starved in 0.1 % FBS supplemented with  
199 300 ng/mL doxycycline to induce LOX-1 expression for 24 hours. Then, oxLDL was  
200 added to cells and incubated for 24 hours. Cells were washed once with PBS and lysed  
201 by incubation with 150  $\mu$ L Passive Lysis Buffer from the Dual-Luciferase Reporter Assay  
202 Kit (Promega) for 15 minutes at room temperature with mixing. Lysates (10  $\mu$ L) were  
203 loaded onto a 96-well white plate, and firefly and Renilla luciferase activities were  
204 determined. Luminescence was measured by using a Spark<sup>®</sup> microplate reader (TECAN,  
205 Switzerland)

206

207 **Transfection of human endothelial cells with siRNA**

208 HUVECs and HAVSMCs were plated to be 50% confluent on the day of transfection.  
209 Silencer<sup>®</sup> select siRNA for LOX-1 and/or AT1 (Thermo Fisher Scientific, USA) was  
210 transfected into the cells in media without serum and antibiotics using lipofectamine

211 RNAiMAX (Thermo Fisher Scientific, USA), according to the manufacturer's  
212 instructions. Treatment with Dil-oxLDL was performed 24 h after transfection.

213

#### 214 **Quantitative real-time PCR**

215 Total RNA was extracted using an RNeasy Mini Kit (Thermo Fisher Scientific, USA)  
216 with DNase I treatment, and an equivalent amount of RNA was transcribed to cDNA by  
217 the RevetraAce qPCR RT kit (FSQ-101, TOYOBO, Japan). Quantitative real-time PCR  
218 was performed and analyzed on a model 7900 sequence detector (Thermo Fisher  
219 Scientific, USA) using TaqMan gene-expression assays for *LOX-1* (Hs01552593\_m1)

220 and *ATI* (5'-ACGTGTCTCAGCATTGATCGAT-3' and 5'-

221 GTCGAAGGCGGGACTTCA-3' for primers, and 5'-CCTGGCTATTGTTCACC-3' for

222 probe), or the SYBR green qPCR system (Thermo Fisher Scientific, USA) with specific

223 primer pairs for *SCARB1* (5'-CTGTGGGTGAGATCATGTGG-3' and 5'-

224 GCCAGAAGTCAACCTTGCTC-3'), *ARRB1* (5'-GGAGAACCCATCAGCGTCAA-3'

225 and 5'-GGGCACTTGTACTGAGCTGT-3'), *ARRB2* (5'-

226 CAACTCCACCAAGACCGTCAAGA-3' and 5'-

227 TTCGAGTTGAGCCACAGGACACTT-3'), *GRK2* (5'-ATGCATGGCTACATGTCCA-

228 3' and 5'-ATCTCCTCCATGGTCAGCAG-3'), *GRK3* (5'-

229 AGCTGTAGAACACGTACAAAGTC-3' and 5'-ATGTCACCTCGAAGGCTTTCA-3'),  
230 *GRK5* (5'-ACCTGAGGGGAGAACCATTC-3' and 5'-TGGACTCCCCTTTCCTCTTT-  
231 3'), *GRK6* (5'-TAGCGAACACGGTGCTACTC-3' and 5'-  
232 GCTGATGTGAGGGAACTGGA-3'), *CLTC* (5'-GCCAGATGTCGTCCTGGAAA-3'  
233 and 5'-AGCTGGGGCTGACCATAAAC-3'), and *CAVI* (5'-  
234 CCAAGGAGATCGACCTGGTCAA-3' and 5'-GCCGTCAAAACTGTGTGTCCT-3')  
235 The expression level of each gene was determined by the standard curve method and  
236 normalized using *GAPDH* mRNA (5'-GCCATCAATGACCCCTTCATT-3' and 5'-  
237 TCTCGCTCCTGGAAGATGG-3') as an internal control.

### 238 **Detection of phosphorylation of ERK1/2**

239 Cells treated with oxLDL or vehicle were kept in an incubator at 37°C for 10 min.  
240 Subsequently, cells were washed twice with PBS, and lysed using M-PER Mammalian  
241 Protein Extraction Reagent (Thermo Scientific, Waltham, MA, USA) with protease  
242 inhibitor and phosphatase inhibitor followed by Western blotting analysis as described  
243 below.

### 244 **Western blotting analysis**

245 Proteins were separated by SDS-PAGE and electrophoretically transferred to  
246 polyvinylidene fluoride membranes for Western blot analysis. The membranes were

247 blocked with 5% nonfat dried milk and incubated with primary antibodies overnight at  
248 4°C. The primary antibodies used in this study were anti-phospho-ERK1/2  
249 (Thr202/Tyr204) antibody, anti-total-ERK1/2 antibody (Cell Signaling Technology,  
250 Danvers, MA, USA). Bands were visualized using Chemi-Lumi One Super (Nacalai  
251 Tesque). Densitometric analysis was performed with chemiluminescence detection  
252 system (LAS-4000 mini, GE Healthcare, Pittsburgh, PA, USA)

253

254 **Bioluminescence resonance energy transfer assay to monitor AT1- $\beta$ -arrestin**  
255 **interaction**

256 CHO-K1 cells were seeded onto a 35 mm dish at a density of  $3 \times 10^5$  cells. The following  
257 day, cells were transfected with AT1-rluc,  $\beta$ -arrestin2-mVenus, and non-fluorescence-  
258 labelled LOX-1, or Dectin-1 of 0.9, 0.3, and 1.8  $\mu$ g, respectively, using Lipofectamin  
259 LTX & PLUS reagent (Thermo Fisher Scientific, USA), according to the manufacturer's  
260 instructions. Cells were also transfected with AT1-rluc and non-fluorescence-labelled  
261 Dectin-1 of 0.9 and 1.8  $\mu$ g without  $\beta$ -arrestin2-mVenus. Cultures were transferred to  
262 serum-free conditions after 24 h of transfection and further incubated for 24 h. Thereafter,  
263 cells were prepared in white clear-bottom 96-well plates at a density of 100,000 cells per  
264 well. Coelenterazine was added to each well at a final concentration of 5  $\mu$ M and assays

265 were carried out immediately on a Spark<sup>®</sup> microplate reader (TECAN, Switzerland), and  
266 the BRET ratio (emission mVenus/emission Rluc) was calculated. After 3 min of reading  
267 of the baseline (the final baseline reading is presented at 0), cells were exposed to vehicle,  
268 oxLDL (100 µg/ml), SII (10<sup>-5</sup> M), or AII (10<sup>-5</sup> M) for 10 min. The relative change in  
269 intramolecular BRET ratio was calculated by subtracting the average BRET ratio  
270 measured for cells stimulated with vehicle.

271

## 272 **Statistical analyses**

273 All data are presented as the mean ± SEM. Significant differences between two treatments  
274 or among multiple treatments were determined by Student's t-test or one-way ANOVA  
275 with Bonferroni testing, respectively.

276

277

278

279

## 280 **References**

281 Fujita, Y., Kakino, A., Nishimichi, N., Yamaguchi, S., Sato, Y., Machida, S., Cominacini, L.,  
282 Delneste, Y., Matsuda, H., and Sawamura, T. (2009). Oxidized LDL receptor LOX-1 binds  
283 to C-reactive protein and mediates its vascular effects. *Clin Chem* 55, 285-294.  
284 Haendeler, J., Ishida, M., Hunyady, L., and Berk, B.C. (2000). The third cytoplasmic loop of  
285 the angiotensin II type 1 receptor exerts differential effects on extracellular signal-  
286 regulated kinase (ERK1/ERK2) and apoptosis via Ras<sup>-</sup> and Rap1-dependent pathways. *Circ*



287 Res 86, 729-736.

288 Kang, D.S., Kern, R.C., Puthenveedu, M.A., von Zastrow, M., Williams, J.C., and Benovic,  
289 J.L. (2009). Structure of an arrestin2-clathrin complex reveals a novel clathrin binding  
290 domain that modulates receptor trafficking. *J Biol Chem* 284, 29860-29872.

291 Krupnick, J.G., Santini, F., Gagnon, A.W., Keen, J.H., and Benovic, J.L. (1997). Modulation  
292 of the arrestin-clathrin interaction in cells. Characterization of beta-arrestin dominant-  
293 negative mutants. *J Biol Chem* 272, 32507-32512.

294 Qian, H., Pipolo, L., and Thomas, W.G. (2001). Association of beta-Arrestin 1 with the type  
295 1A angiotensin II receptor involves phosphorylation of the receptor carboxyl terminus and  
296 correlates with receptor internalization. *Mol Endocrinol* 15, 1706-1719.

297 Yamamoto, K., Kakino, A., Takeshita, H., Hayashi, N., Li, L., Nakano, A., Hanasaki-  
298 Yamamoto, H., Fujita, Y., Imaizumi, Y., Toyama-Yokoyama, S., *et al.* (2015). Oxidized LDL  
299 (oxLDL) activates the angiotensin II type 1 receptor by binding to the lectin-like oxLDL  
300 receptor. *FASEB J* 29, 3342-3356.

301

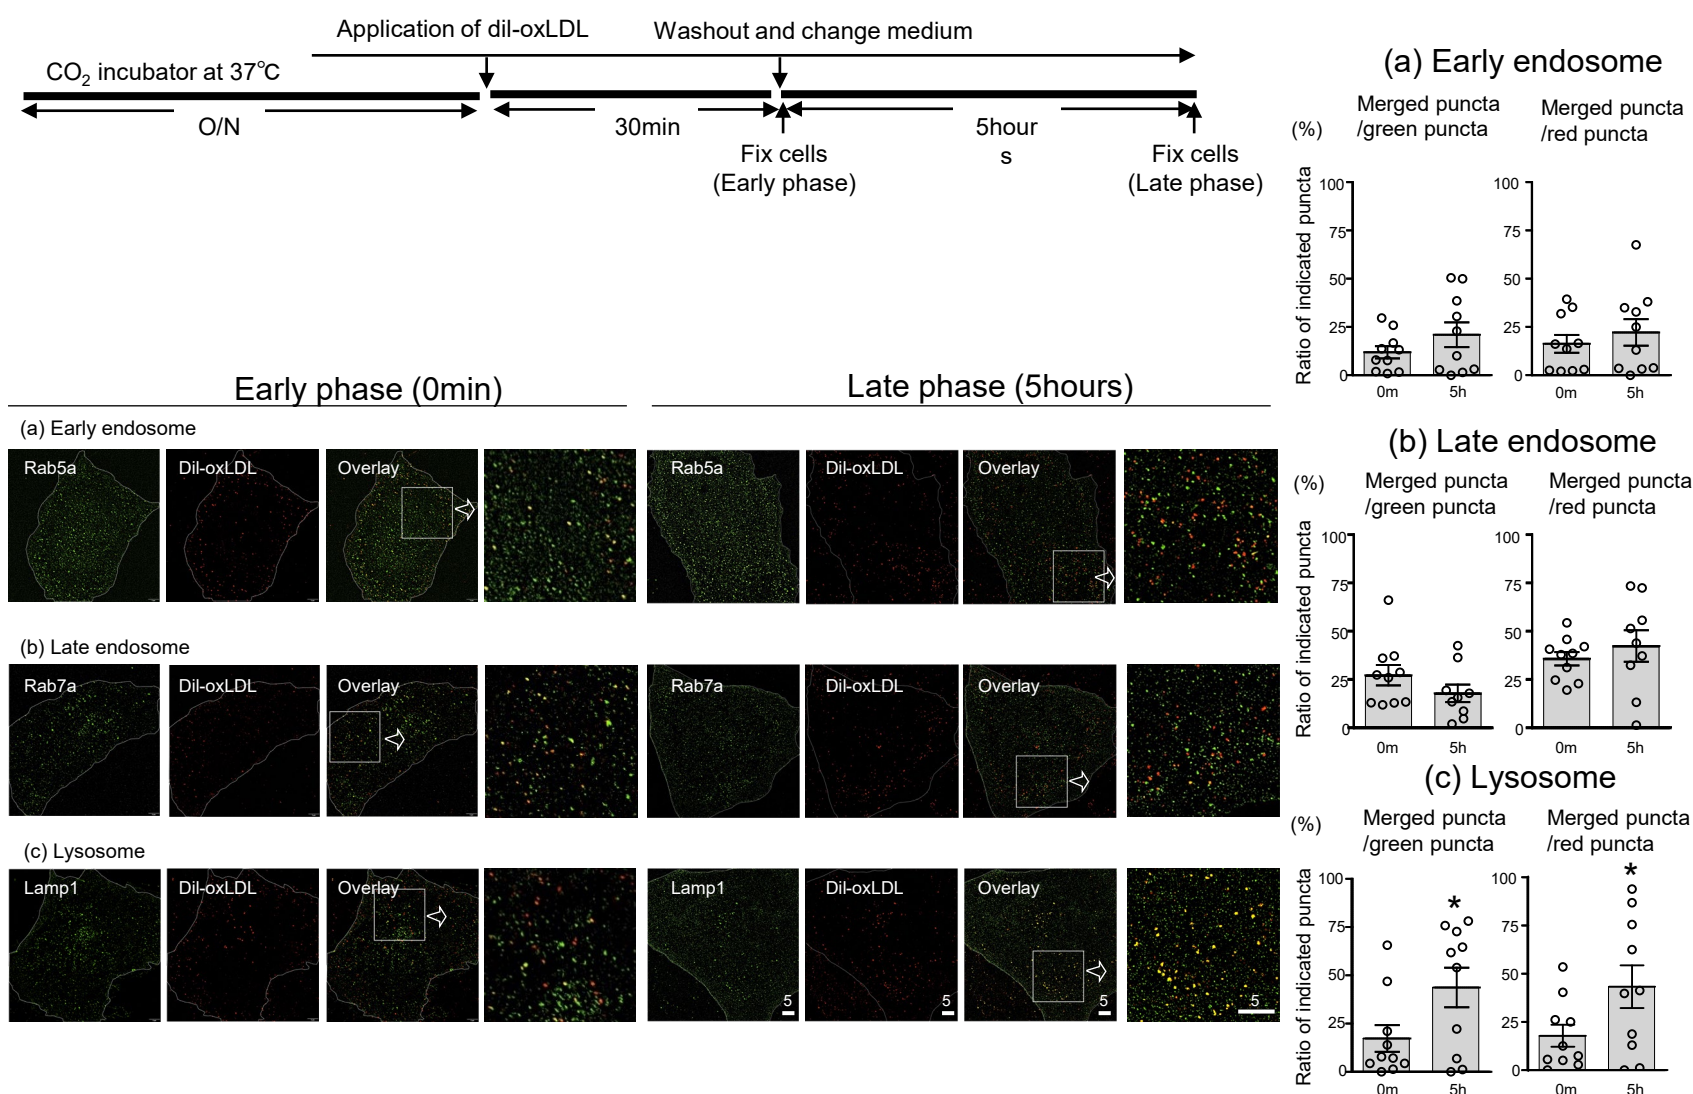

**Figure S1: Endocytic traffic of oxLDL with early endosomes, late endosomes and lysosome in CHO. Related to Figure 5.**

Visualization of co-localization of oxLDL with (a) early and (b) late endosomes, and (c) lysosomes using a confocal super-resolution microscope. Endosomes and lysosomes were visualized by transduction with a viral vector encoding GFP-fused indicated proteins in CHO-LOX-1-AT1 (CellLight™, Thermo Fisher Scientific, USA). After 30 min of treatment with 2 μg/ml Dil-labeled oxLDL, cells were washed and fixed immediately (early phase, 0 min) or after 5 h of additional incubation without oxLDL (late phase, 5 h). Approximate cell boundaries are marked with dotted lines. Yellow (merged) puncta in overlaid images indicate co-localization of oxLDL with each organelle.

(left lower panels) Representative images, scale bar, μm. (right panels) Quantification of proportion of merged puncta relative to total green (early, late endosomes or lysosomes) or red puncta (oxLDL) (n = 9–10, each group), analyzed as described in the methods. 0 m, early phase (0 min); 5 h, late phase (5 h); Data are represented as mean +/- SEM. The differences were determined by Student's t-test. \**p* < 0.05 vs. the others

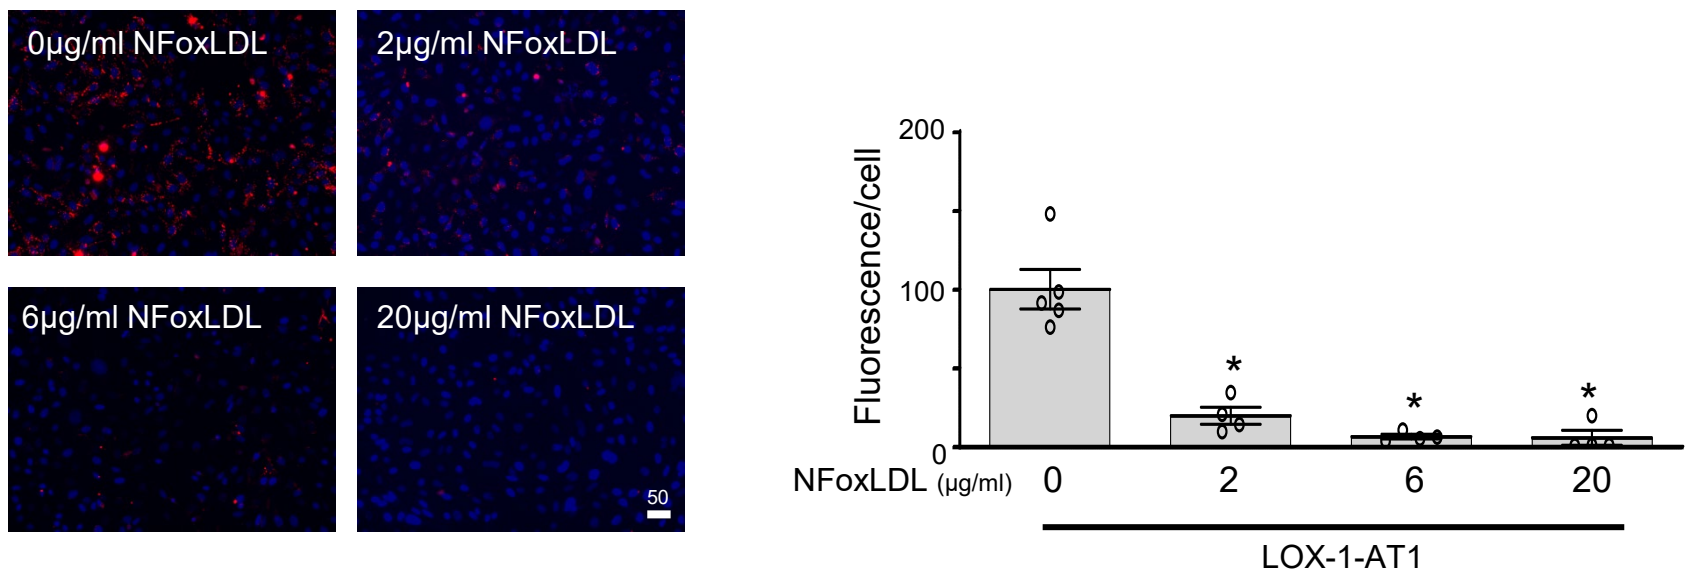

**Figure S2: Cellular accumulation of Dil-oxLDL was blocked by non fluorescent oxLDL in CHO. Related to Figure 5.**

Intracellular uptake of Dil-labeled oxLDL in CHO-LOX-1-AT1 with or without simultaneous treatment with non-fluorescent oxLDL (n = 4, each). Scale bar, µm

The graph indicates the fluorescence/number of nuclei, and the average value of the group at the far left was normalized to 100%. Data are represented as mean +/- SEM. The differences were determined by one-way ANOVA with Bonferroni correction. \*  $p < 0.01$  vs. treatment without non-fluorescent oxLDL

NF-oxLDL, non-fluorescent oxLDL

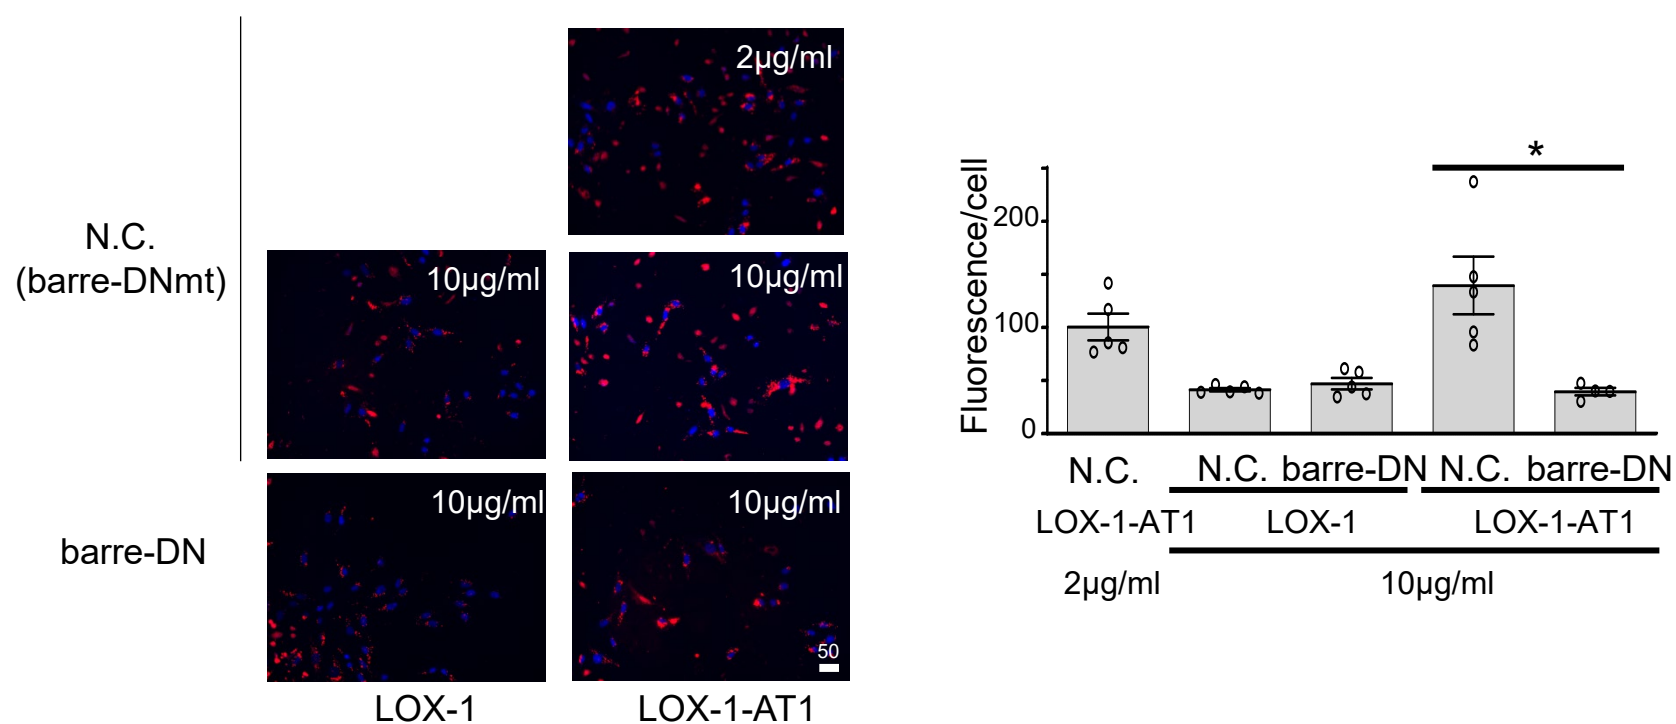

**Figure S3: AT1-independent uptake of a higher concentration of oxLDL via LOX-1 was  $\beta$ -arrestin independent in CHO. Related to Figure 5.**

Intracellular uptake of Dil-labeled oxLDL at the indicated concentrations in CHO-LOX-1 or CHO-LOX-1-AT1 transfected with dominant negative vector of  $\beta$ -arrestin (barre-DN) or negative control vector (N.C.) (n = 5, each). Scale bar,  $\mu\text{m}$

The graph indicates the fluorescence/number of nuclei, and the average value of the group at the far left was normalized to 100%. Data are represented as mean  $\pm$  SEM. The differences were determined by one-way ANOVA with Bonferroni correction. \* $p < 0.01$

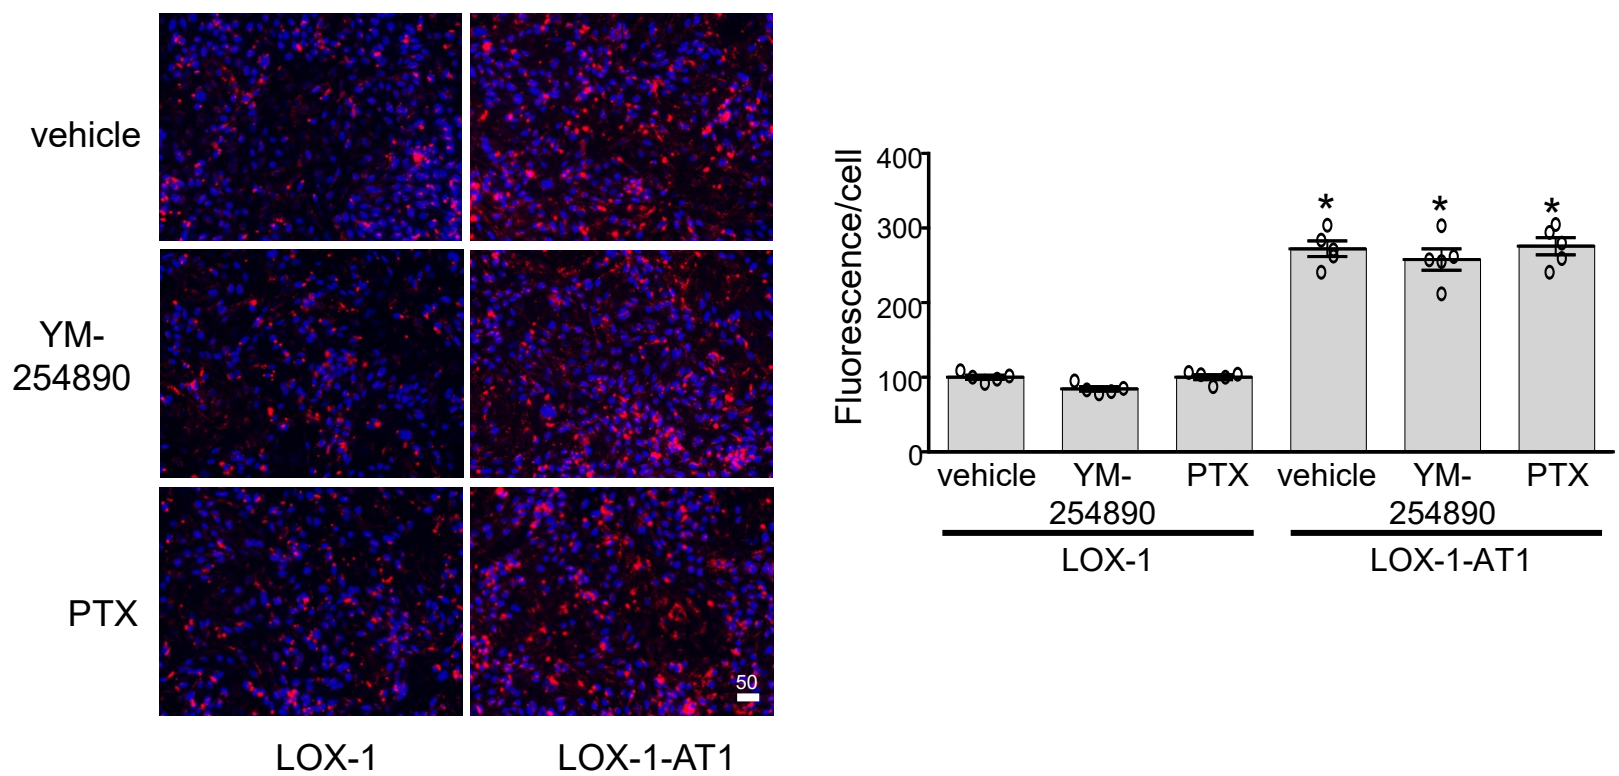

**Figure S4: Cellular accumulation of oxLDL was independent of *G $\alpha$ i* and *G $\alpha$ q*-dependent pathways in CHO.**

**Related to Figure 5.**

Intracellular uptake of Dil-labeled oxLDL at the indicated concentrations in CHO-LOX-1 or CHO-LOX-1-AT1 pretreated with vehicle, Gq inhibitor, YM254890, or Gi inhibitor, pertussis toxin (PTX) (n = 5, each). Scale bar,  $\mu\text{m}$  YM-254890 and PTX were pretreated at 1  $\mu\text{M}$  and 25 ng/ml for 30 min and 12 h before stimulation, respectively.

The graph indicates the fluorescence/number of nuclei, and the average value of the group at the far left was normalized to 100%. Data are represented as mean  $\pm$  SEM. The differences were determined by one-way ANOVA with Bonferroni correction. \* $p < 0.01$  vs. treatment-matched wells in CHO-LOX-1

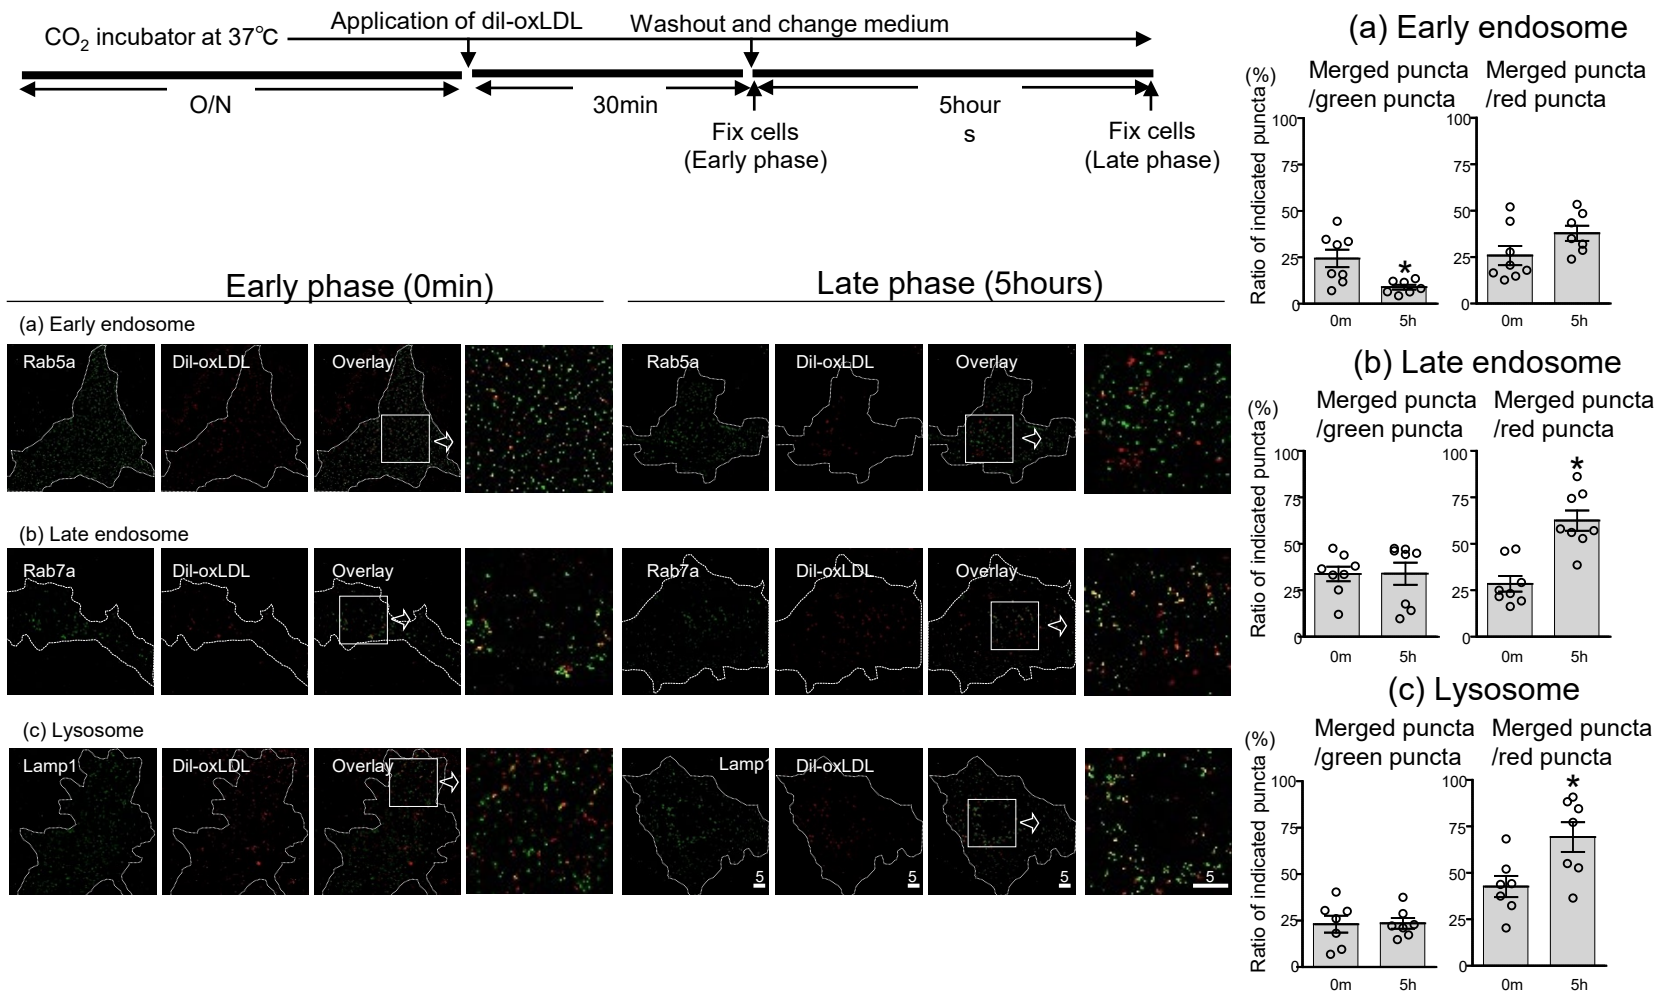

**Figure S5: Endocytic traffic of oxLDL with early endosomes, late endosomes and lysosome in HUVECs. Related to Figure 6.**

Visualization of co-localization of oxLDL with (a) early and (b) late endosomes, and (c) lysosomes using a confocal super-resolution microscope. Endosomes and lysosomes were visualized after transduction of a viral vector encoding GFP-fused indicated proteins in human umbilical vein endothelial cells (HUVECs) (CellLight™, Thermo Fisher Scientific, USA). After 30 min of treatment with 2 μg/ml Dil-labeled oxLDL, cells were washed and fixed immediately (early phase, 0 min) or after 5 h of additional incubation without oxLDL (late phase, 5 h). Approximate cell boundaries are marked with dotted lines. Yellow (merged) puncta in overlaid images indicate co-localization of oxLDL with each organelle.

(left lower panels) Representative images, scale bar, μm. (right panels) Quantification of proportion of merged puncta relative to total green (early, late endosomes or lysosomes) or red puncta (oxLDL) (n = 9–10, each group), analyzed as described in the methods. 0 m, early phase (0 min); 5 h, late phase (5 h); Data are represented as mean +/- SEM. The differences were determined by Student's t-test. \**p* < 0.05 vs. the others

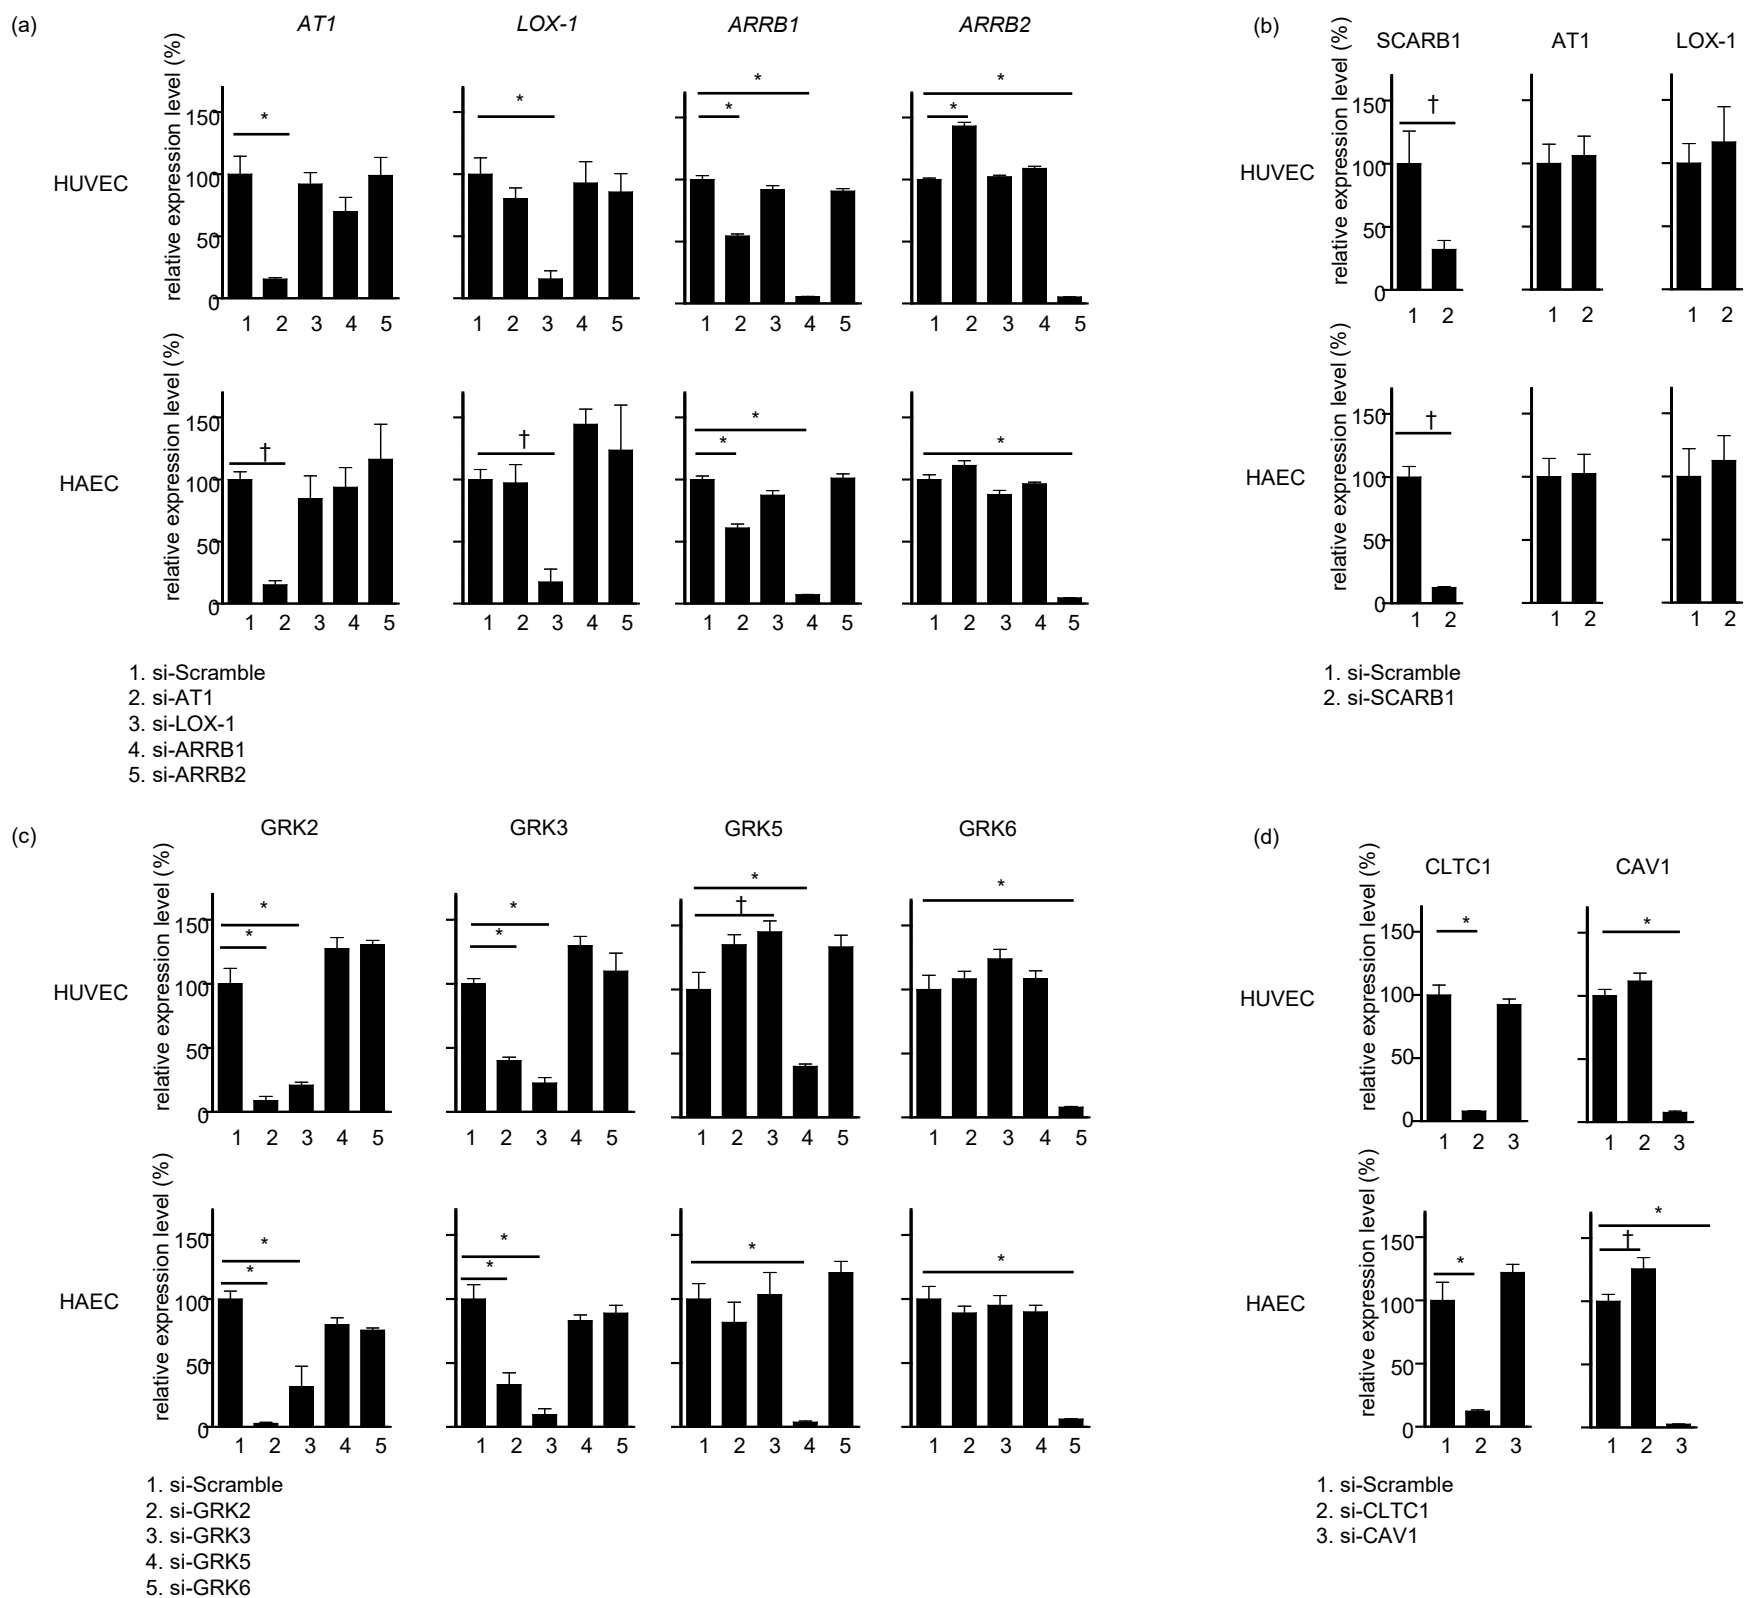

**Figure S6: The siRNA-mediated knockdown efficiency of indicated genes in HUVECs and HAECs. Related to**

**Figure 6.**

(a–d) Confirmation of the efficiency of siRNA-mediated knockdown of indicated genes by quantitative real-time PCR in human umbilical vein endothelial cells (HUVECs) and human aortic endothelial cells (HAECs) (n = 4–5, each).

(a) siRNA against *AT1* decreased *ARRB1* expression in HUVECs and HAECs, and increased *ARRB2* expression in HUVECs, suggesting an undetermined interaction at the transcriptional level. (c) siRNA against *GRK2* or *GRK3* decreased *GRK3* or *GRK2* levels in HUVECs and HAECs, respectively, suggesting an interaction at the transcriptional level. The expression level of each gene was normalized using *GAPDH* mRNA as an internal control. Data are represented as mean  $\pm$  SEM. Differences with respect to the relative gene expression of cells treated with scramble siRNA (si-scramble) were determined by one-way ANOVA with Bonferroni correction. \* $p < 0.01$ , † $p < 0.05$

## HUVEC

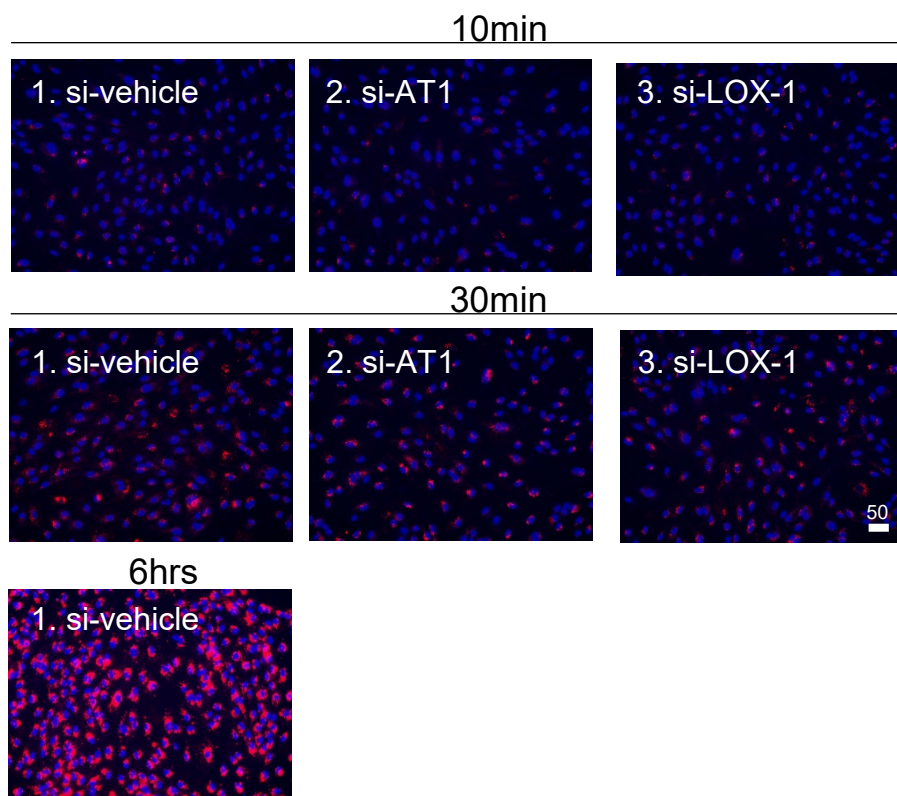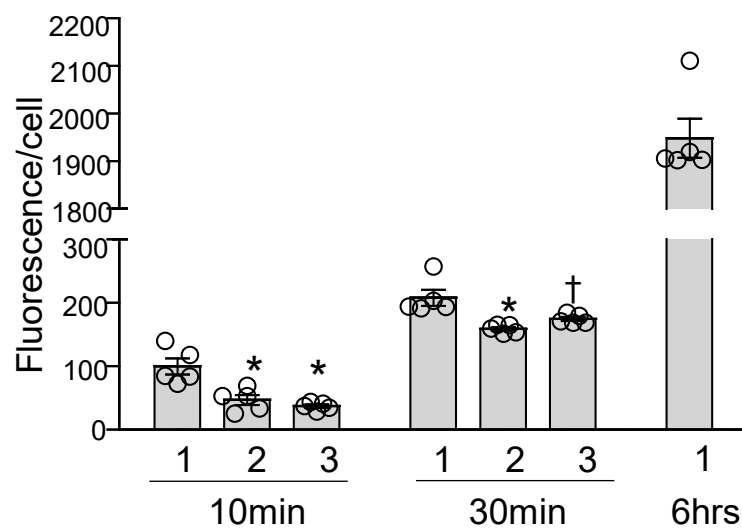

## HAEC

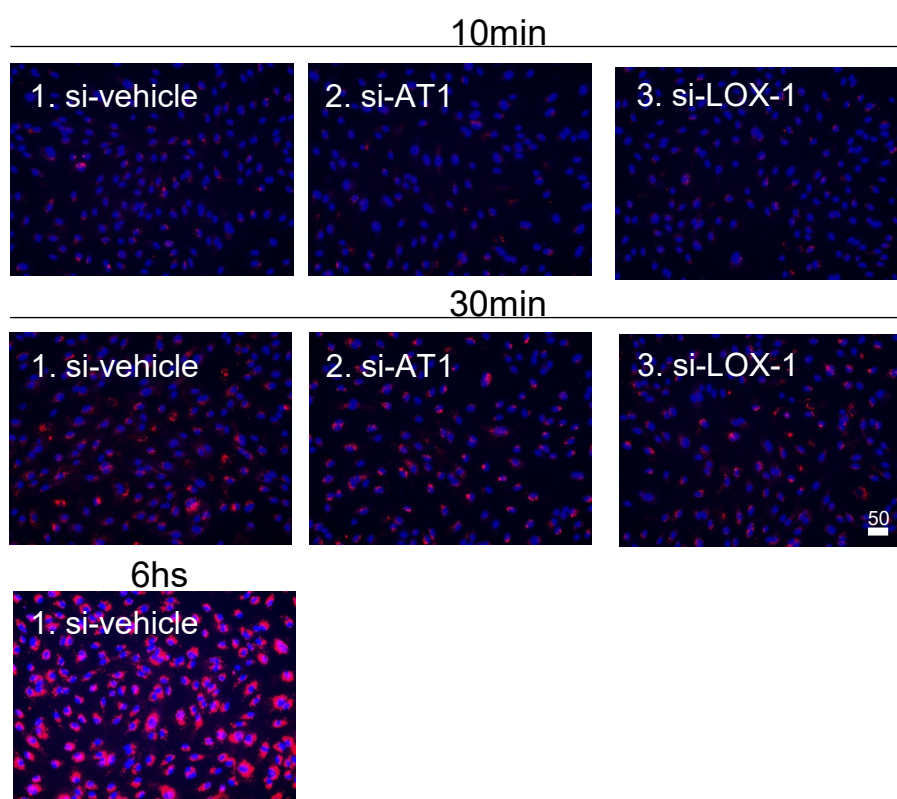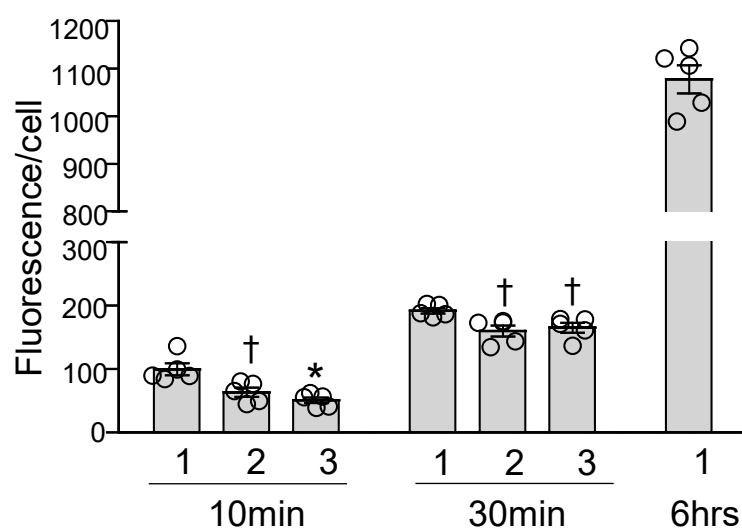

**Figure S7: The inhibitory effect of siRNA against AT1 or LOX-1 in HUVECs and HAECs. Related to Figure 6.**

Intracellular uptake of 2 μg/ml Dil-labeled oxLDL treated for three different durations to human umbilical vein endothelial cells (HUVECs) and human aortic endothelial cells (HAECs) with siRNA-mediated knockdown of the indicated genes (n = 5, each). Scale bar, μm

The graph indicates the fluorescence/number of nuclei, and the average value of the group at the far left was normalized to 100%. Data are represented as mean +/- SEM. The differences were determined by one-way ANOVA with Bonferroni correction \* $p < 0.01$  vs. control in each time course, † $p < 0.05$  vs. control in each time course



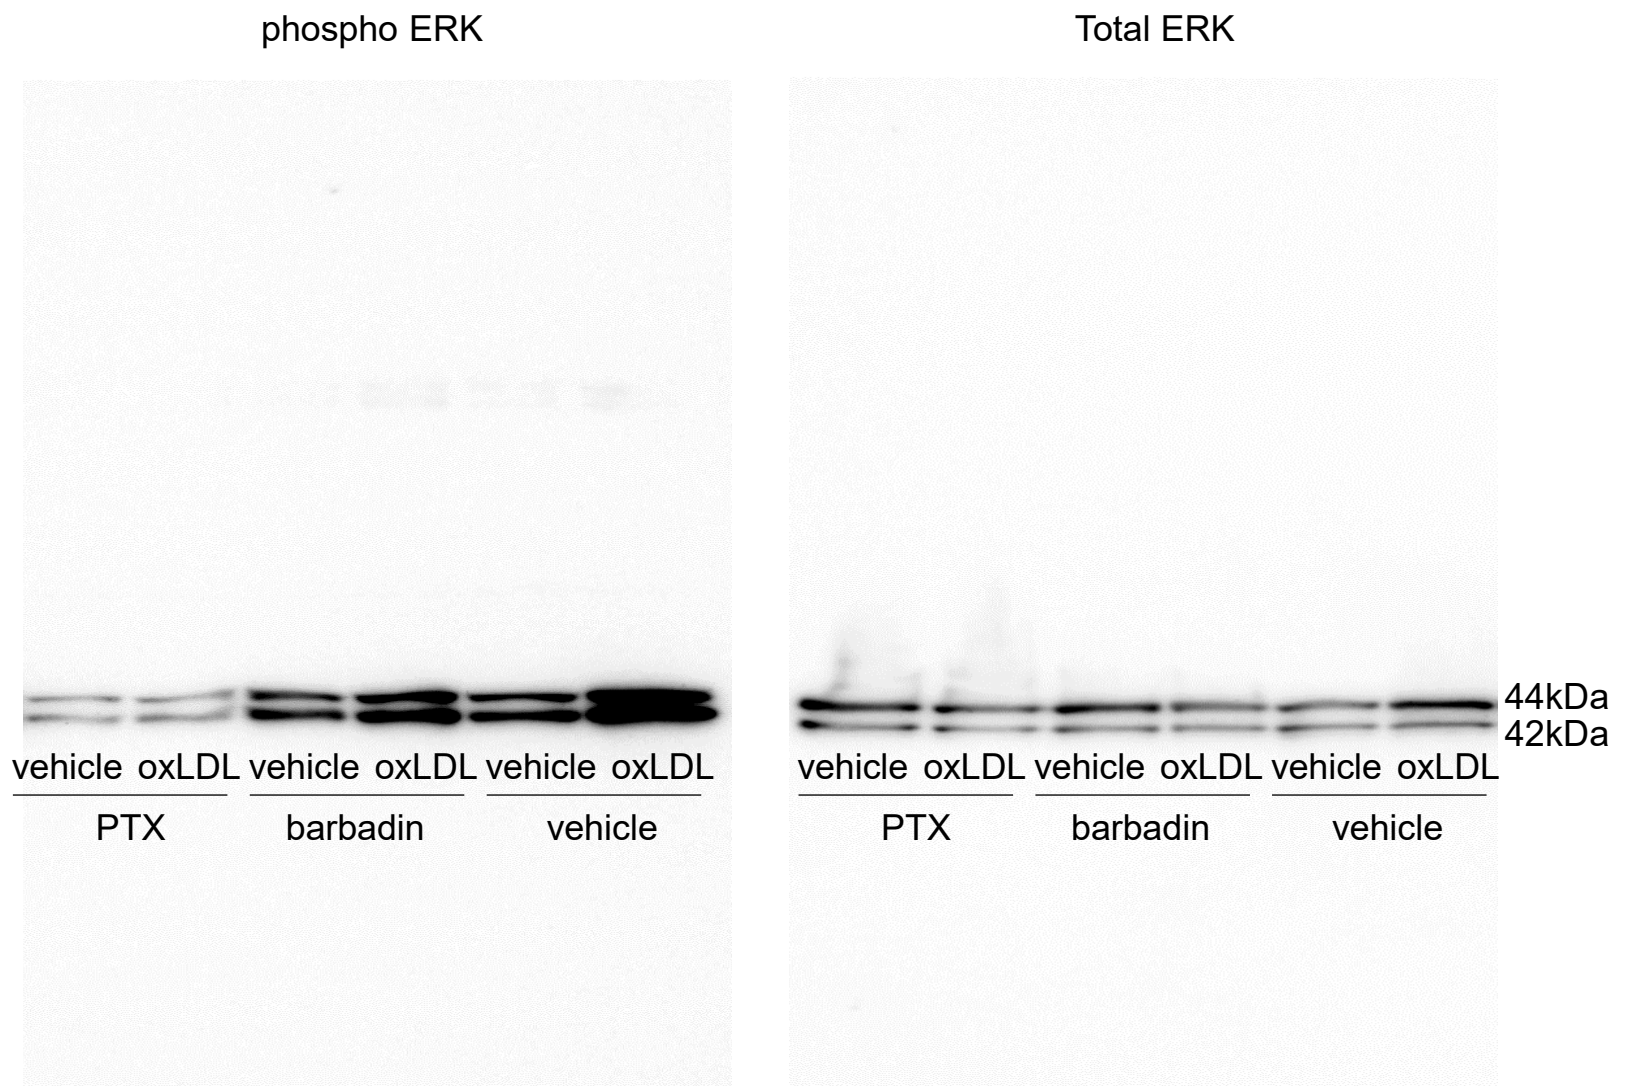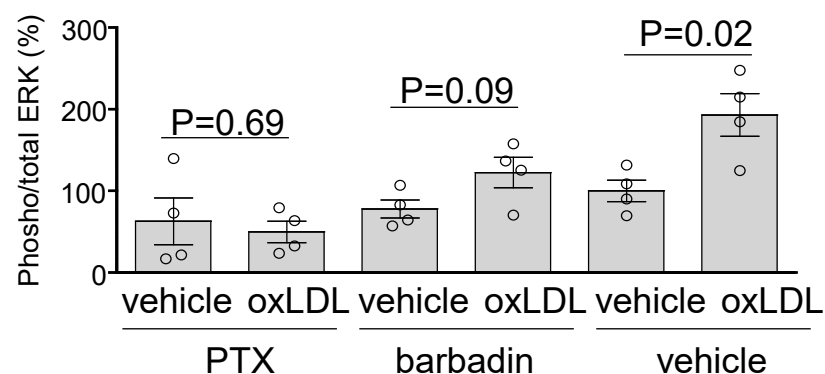

**Figure S8: ERK1/2 activation induced by oxLDL was inhibited either by a Gi-specific inhibitor or a  $\beta$ -arrestin inhibitor in HUVECs. Related to Figure 6.**

Immunoblotting for detecting phosphorylation of extracellular signal-regulated kinase 1/2 in human umbilical vein endothelial cells (HUVECs). Cells were stimulated with vehicle or 20 $\mu$ g/ml oxLDL for 10 min after a 6-h pre-treatment with vehicle, 25 ng/ml PTX, a Gi inhibitor, or 10  $\mu$ M barbadin, a  $\beta$ -arrestin inhibitor. (Upper panel)

Representative immunoblots of phosphorylated ERK1/2 and total ERK1/2. (Lower panel) Quantification of ERK 1/2 activation by densitometric analysis of phosphorylated/total ERK 1/2. The average activation after vehicle treatment following vehicle pretreatment was set at 100%. Data are represented as mean  $\pm$  SEM. The difference in ERK1/2 activation between oxLDL-treated and vehicle-treated cells was determined by Student's t-test.

We confirmed that the antibodies for phosphorylated and total ERK1/2 visualize only the indicated two bands equivalent to the molecular weights of 42 and 44kDa.

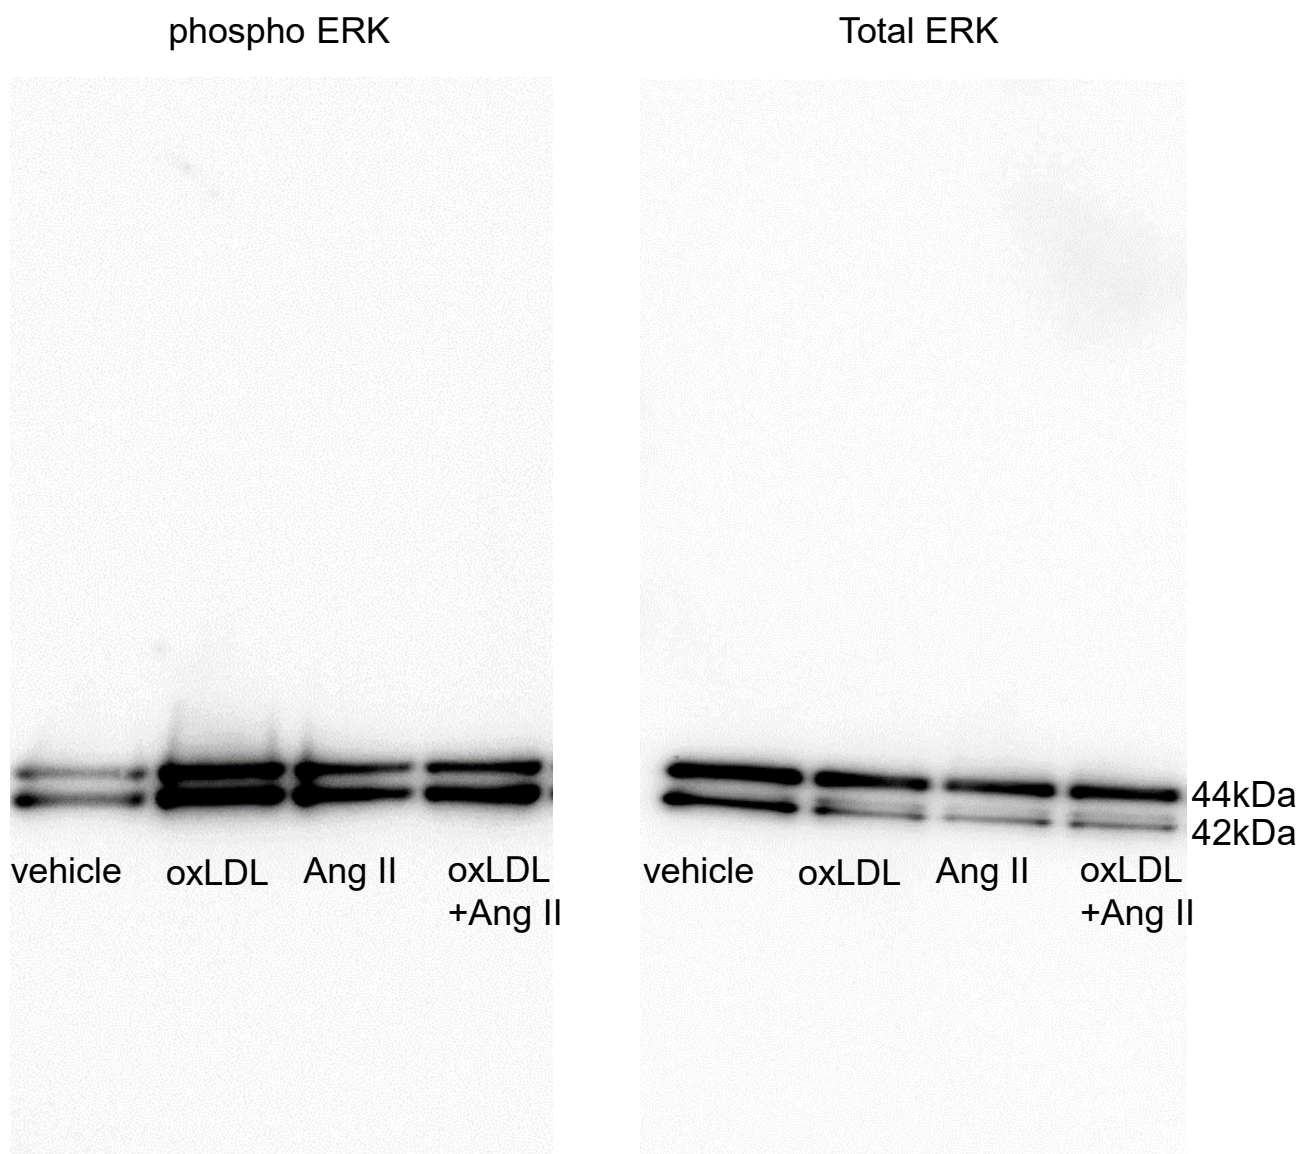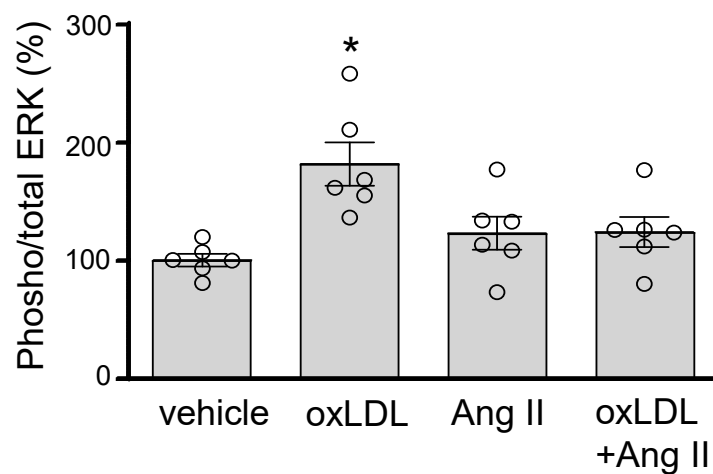

**Figure S9: The effect of Ang II and oxLDL on cellular signaling was not additive but rather competitive in HUVECs. Related to Figure 6.**

Immunoblotting for detecting phosphorylation of extracellular signal-regulated kinase 1/2 in human umbilical vein endothelial cells (HUVECs). Cells were stimulated with vehicle, 20 $\mu$ g/ml oxLDL, 10<sup>-7</sup>M Ang II or oxLDL in combination with Ang II for 10 min. (Upper panel) Representative immunoblots of phosphorylated ERK1/2 and total ERK1/2. (Lower panel) Quantification of ERK 1/2 activation by densitometric analysis of phosphorylated/total ERK 1/2. The average activation after vehicle treatment following vehicle pretreatment was set at 100%. Data are represented as mean  $\pm$  SEM. Differences were determined by one-way ANOVA with Bonferroni correction.

\* $p < 0.01$  vs. control

We confirmed that the antibodies for phosphorylated and total ERK1/2 visualize only the indicated two bands equivalent to the molecular weights of 42 and 44kDa.

(a)

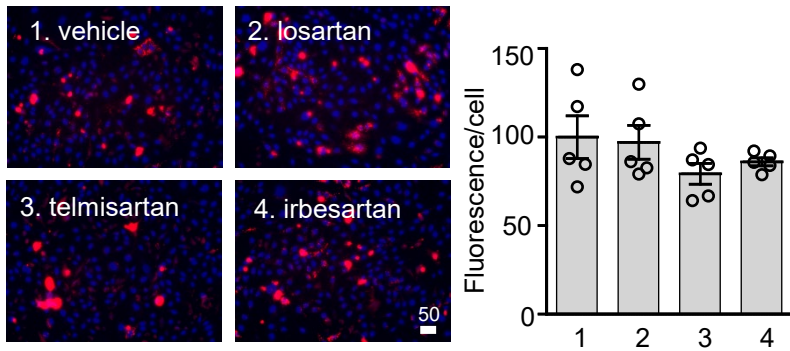

(b)

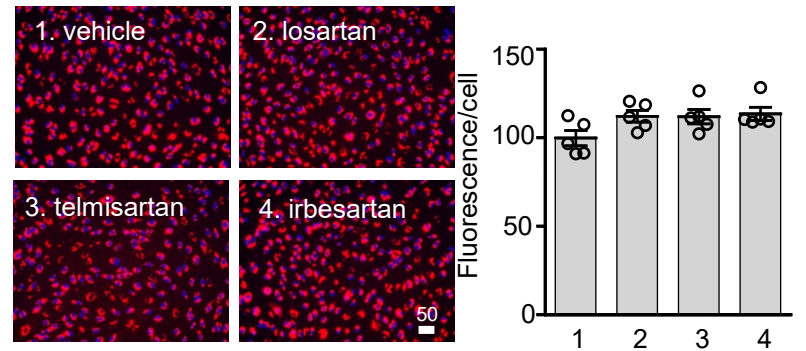

**Figure S10: ARBs had no effect on oxLDL uptake in CHO or HUVECs. Related to Figure 6.**

Intracellular uptake of 2  $\mu\text{g/ml}$  Dil-labeled oxLDL in (a) CHO-LOX-1-AT1 or (b) HUVECs pretreated with vehicle or 10  $\mu\text{M}$  AT1 blockers (ARBs) ( $n = 5$ , each). The graph indicates the fluorescence/number of nuclei, and the average value of the group at the far left was normalized to 100%. Data are represented as mean  $\pm$  SEM. The differences were determined by one-way ANOVA.

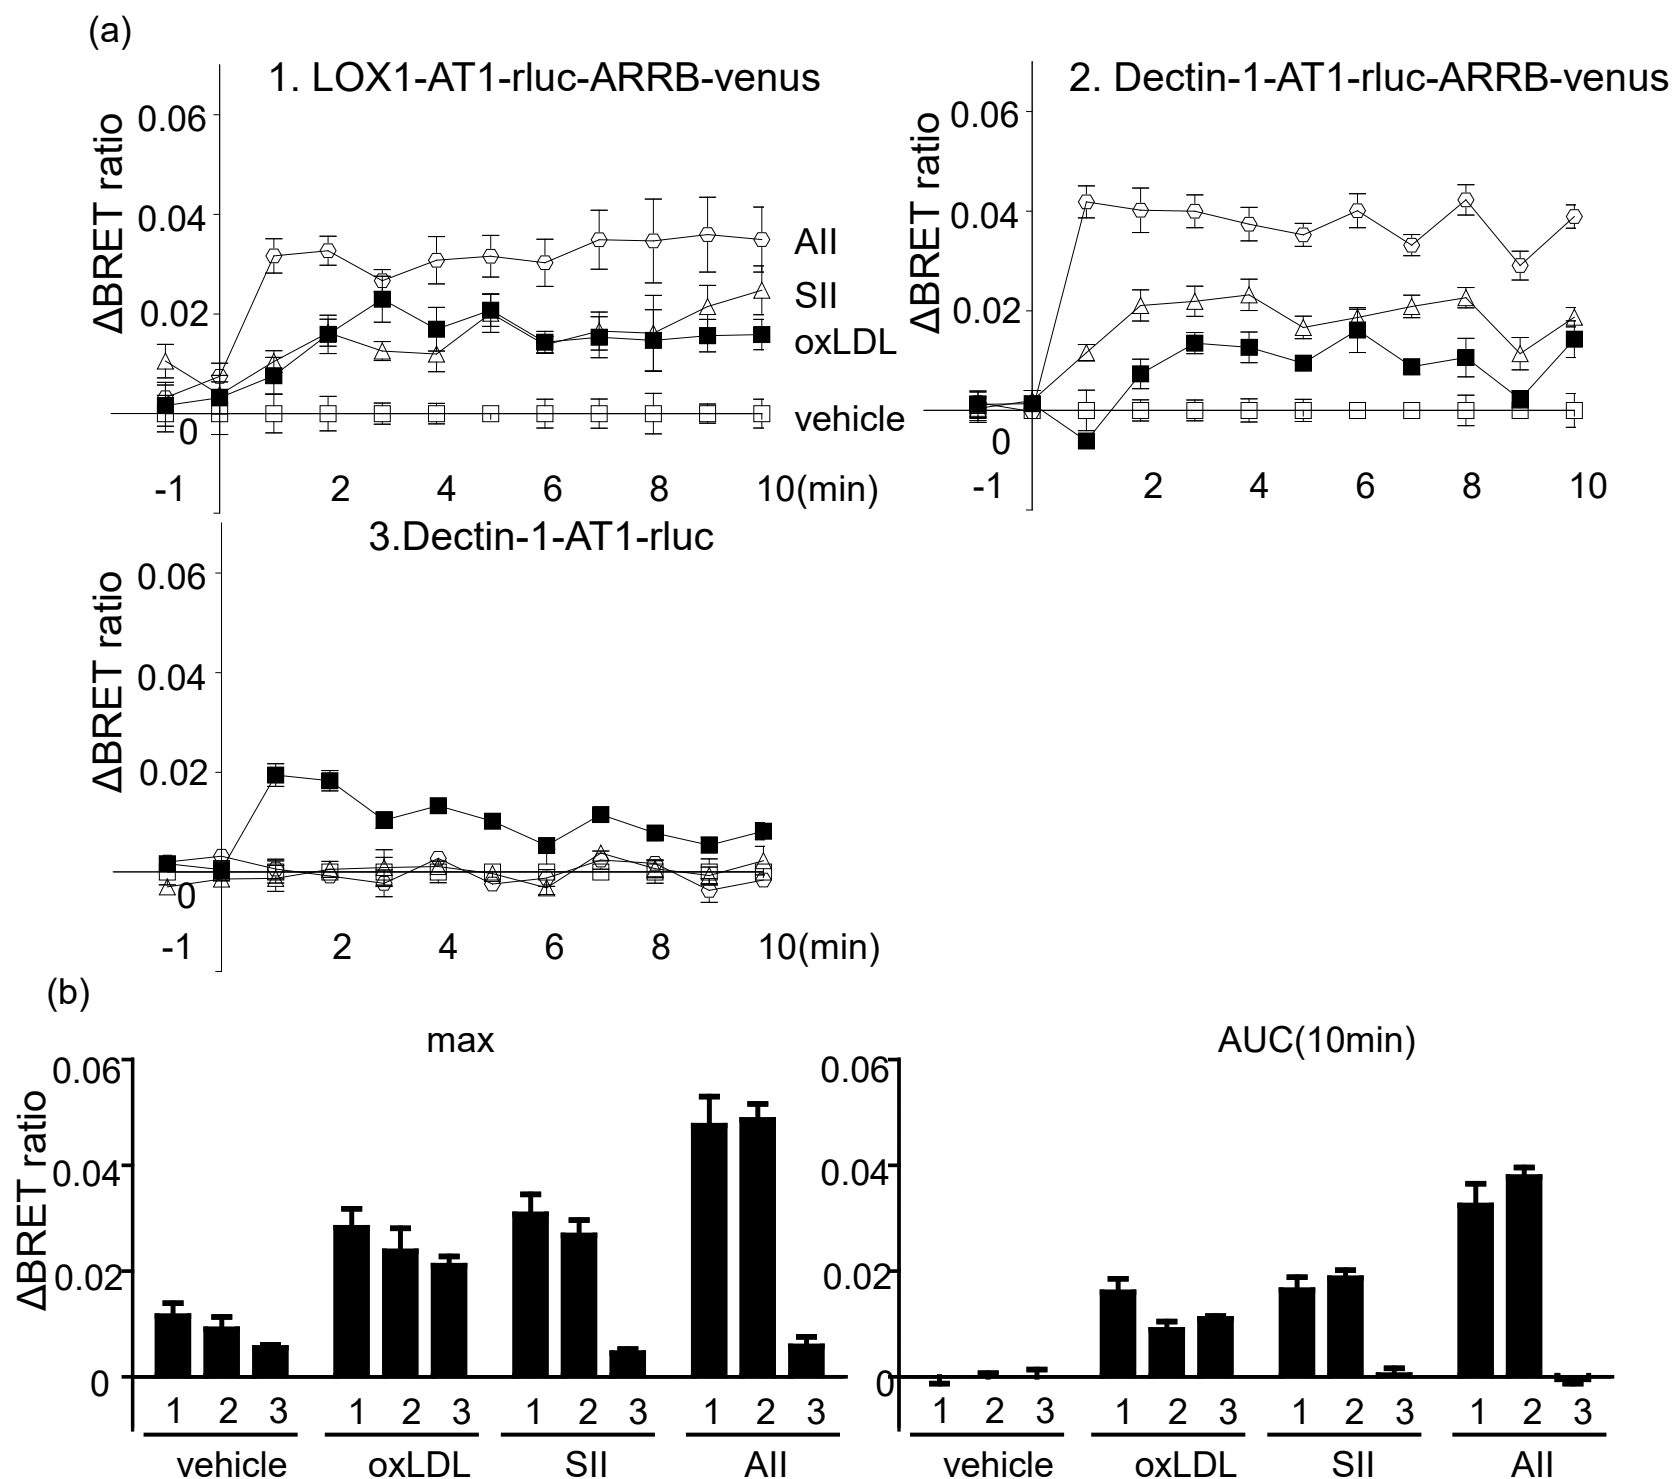

**Figure S11:oxLDL-induced BRET between AT1-Rluc8 and  $\beta$ -arrestin 2 (ARRB2)-mVenus in CHO-K1 cells in the presence of LOX-1. Related to Figure 4.**

(a) Kinetic data for real-time BRET assay. Coelenterazine h was added before measurement, and each reagent (vehicle, angiotensin II (Ang II) ( $10^{-5}$  M), SII, an arrestin-biased agonist of AT1 ( $10^{-5}$  M), or oxLDL ( $100 \mu\text{g/ml}$ )) was added immediately after 0 min. The  $\Delta$ BRET ratio adjusted by that in vehicle treatment was calculated as described in the Online Methods ( $n = 8$  in 1. LOX1-AT1-rluc-ARRB2-venus, and 2. Dectin-1-AT1-rluc-ARRB2-venus,  $n = 4$  in 3. Dectin-1-AT1-rluc (without ARRB2-venus)).

(b) Comparison of  $\Delta$ BRET ratios among cells transfected with 1. LOX1-AT1-rluc-ARRB2-venus, 2. Dectin-1-AT1-rluc-ARRB2-venus, and 3. Dectin-1-AT1-rluc. Max BRET ratio and area under the curve (AUC) at 1–10 min are presented.

There were no significant differences in max and AUC of the  $\Delta$ BRET ratio among the transfection in response to oxLDL.

Data are represented as mean  $\pm$  SEM. The differences were determined by one-way ANOVA.
